1

## 1 **Biodegradation of naphthalene mediated by the plant growth promoting rhizobacteria**

2

3 **Salme Timmusk<sup>1,\*</sup>, Tiiu Teder<sup>2</sup> and Lawrence Behers<sup>3</sup>**

4 <sup>1</sup>Department of Forest Mycology and Plant Pathology, Swedish University of Agricultural  
5 Sciences, Sweden

6 <sup>2</sup>Bashan Institute of Science, 1730 Post Oak Ct, Auburn, AL 36830, USA

7 <sup>3</sup>Novawest Communications and Technologies AZ 36830, USA

8

9 \* Corresponding author: Salme Timmusk

10 P.O. Box 7026, SE-75007 Uppsala, Sweden [salme.timmusk@slu.se](mailto:salme.timmusk@slu.se)

11

12 **Abstract: We compared the ability of two bacterial strains, *Paenibacillus polymyxa* A26**  
13 **and *P. polymyxa* A26Sfp, for biodegradation of naphthalene (NAP). The studies were**  
14 **performed under simulated laboratory conditions, in liquid medium and soil with**  
15 **different carbon sources, pH and salt contents. Changes in the luminescence inhibition**  
16 **of *Aliivibrio fischeri*, as an indicator of the baseline toxicity, were observed in degradation**  
17 **mixtures during 7 days of incubation. While both strains expressed the best growth and**  
18 **NAP degradation ability in the minimal salt medium containing sucrose and 5% NaCl at**  
19 **pH 8, the mutant strain remained effective even under extreme conditions.**

20 **A26Sfp was found to be an efficient and potentially industrially important polycyclic**  
21 **aromatic hydrocarbon degradation strain. Its extracellular polysaccharide production**  
22 **is 30% and glucan production twice that of the wild type A 26. The surface tension**  
23 **reduction ability was ascertained as 25–30% increased emulsification ability.**

24

## 25 **Introduction**

26 Crude oils contain many major and minor constituents. The properties of the constituents  
27 influence how the spilled oil behaves and determines the fate and effects of the spill in the  
28 environment <sup>1</sup>. Among the components of crude oil, polycyclic aromatic hydrocarbons (PAHs)  
29 are a class of organic contaminants that contain two or more fused benzene rings; they are

30 considered very important after oil spill accidents because they are toxic, mutagenic,  
31 carcinogenic, and relatively persistent in the environment<sup>2,3</sup>. Of the various forms of PAHs in  
32 crude oil, 16 PAHs including naphthalene are considered as priority pollutants by the  
33 environmental protection agencies<sup>4,5,6,7</sup>.

34

35 Many studies have focused on the isolation of bacteria that produce biomolecules that  
36 promote biodegradation of the PAH and other pollutants, and remove pollutants from the  
37 environment<sup>8,9,10,11,12-16</sup>. Our wild barley (*Hordeum spontaneum*) rhizosphere isolate  
38 *Paenibacillus polymyxa* A 26 originates from a habitat exposed to various stress factors at the  
39 Evolution Canyon (EC) South Facing Slope (SFS)<sup>17,18</sup> (Table 1 and Fig S1). The *P. polymyxa*  
40 A26 Sfp-type 4-phosphopantetheinyl transferase deletion mutant strain (A26Sfp) enhanced  
41 plant drought stress tolerance<sup>19</sup>. The mutant, compared to its wild type A26, is 30% enhanced  
42 in its biofilm exopolysaccharide (EPS) production<sup>20-22</sup>. This correlates with the improved  
43 drought stress tolerance conferred by the strain and the enhanced biocontrol ability<sup>19-23</sup>. *P.*  
44 *polymyxa* is a bacterium widely used in agriculture, industry, and environmental remediation  
45 because it has multiple functions<sup>24-38</sup>. The species has very high metabolic diversity which  
46 results in great differences in the bacterial potential for bio-technological applications<sup>25</sup>. *P.*  
47 *polymyxa* strains from the harsh South Facing Slope (SFS) in comparison to the moderate  
48 North Facing Slope (NFS) at 'Evolution Canyon', Israel, show huge differences in their  
49 metabolism, drought tolerance enhancement and biocontrol ability<sup>29,26,39</sup>. Our *P. polymyxa*  
50 strain A26 is isolated from the stressful SFS and has been shown to be capable of moderate  
51 drought stress tolerance enhancement<sup>25,29</sup>. An important pool of the bioactive compounds of  
52 great interest for biotechnology are non-ribosomal peptides/polyketides. The spectrum of  
53 application of both classes of compounds is large. Non-ribosomal peptides produced by non-  
54 ribosomal peptide synthetases (NRPS) and polyketides are produced by polyketide synthetases  
55 (PKS). Both are very diverse families of natural products with an extremely broad range of  
56 biological activities<sup>40-48</sup>. These molecules exhibit a broad range of structural diversity and  
57 display biological activities that include adaptation to unfavorable environments, and  
58 communication or competition with other microorganism in their natural habitat<sup>30</sup>.

59

60 The *A. fishery* bioluminescence inhibition test constitutes a simple and economic technique,  
61 frequently applied for ecotoxicological screening<sup>49</sup>. The test is sensitive, easy to apply and  
62 reproducible, thereby facilitating testing for the ecotoxicity screening of different compounds.  
63 Several commercially available types of this assay have been developed to determine the acute

64 and chronic toxicities of diverse chemicals.

65

66 In the present investigation, we compared the intrinsic ability of two bacterial strains, A26 and  
67 its mutant A26Sfp, for degradation of NAP in a defined mineral medium and axenic soil. While  
68 the slightly alkaline environment (pH 8), sucrose and 5% NaCl in the medium were most  
69 favorable for both strains, the mutant showed 20–35% higher biodegradation efficiency and  
70 could function under extreme conditions. We explored a possible link, involving improved  
71 emulsification, between the strain's biodegradation ability and the bacterial EPS production.

72

## 73 **Methods**

### 74 Chemicals

75 The polycyclic aromatic hydrocarbon naphthalene, kerosene, hexadecane, was purchased  
76 from Sigma Aldrich.

77

### 78 Biodegradation experiments

79 The experiments were performed in 250 ml Erlenmeyer flask bottles containing 100 ml DF  
80 salt minimal medium (MM) medium as described earlier <sup>50</sup>.

81 Five different carbon sources, including glucose, galactose, fructose, maltose and sucrose,  
82 were added individually into MM medium at a concentration of 1.5%.

83 The bacterial strains were grown on TSB, washed, and resuspended in MM medium (A600,  
84 0.6). 10 ml of the resuspension was inoculated into Erlenmeyer flasks and incubated in a 200  
85 rpm shaker for 24 h at 28±2°C. Furthermore, the NAP (100 mg/L) were added individually to  
86 the culture flasks and incubated in the dark at 200 rpm for 7 days at 28±2°C. Bacterial growth  
87 was detected by measuring the optical density at 600 nm at predetermined time intervals during  
88 the 7 days. All experiments were performed in triplicate. Growth in media without NAP were  
89 used as controls.

### 90 Analysis of NAP biodegradation efficiency by *Aliivibrio fischeri* luminescence inhibition 91 biotest

92 Changes in the luminescence inhibition of *Aliivibrio fischeri*, as an indicator of the baseline  
93 toxicity, were observed in photodegradation mixtures. The BioTox™ Kit was used for the  
94 determination of toxicity of samples. The inhibitory effect of the sample on the light emission  
95 of luminescent bacteria, *A. fischeri* (formerly *Vibrio fischeri*), was measured with a  
96 luminometer.

97 We reconstituted lyophilized aliquots of *A. fischeri* containing NaCl 3% w/v by adding 1 mL  
98 of distilled water and resuspended them in 10–30 mL of the nutrient broth. Two hundred  
99 microliters of the bacteria suspension and 100  $\mu$ L of each sample were added to the microplate  
100 wells. The controls consisted of 200  $\mu$ L of the bacteria plus 100  $\mu$ L of a 3% NaCl solution in  
101 tap water. The emitted light was recorded by a Victor Light 1420 microplate luminometer  
102 (Perkin-Elmer, Norwalk, Conn. USA) at fixed intervals between 0 and 48 h. Five replicates  
103 were prepared for each sample, and the light emission values expressed as relative  
104 luminescence units (RLU). Biodegradation efficiency was calculated by measuring the  
105 luminescence of the bacteria after 30 min of contact with the contaminant. To determine the  
106 toxic effect, we compared the emitted light from the samples at the various dilutions with the  
107 control solution. The less light emitted, the greater the toxicity of the sample. Therefore, the  
108 relative biodegradation efficiency of the bacterial strain is expressed as the percentage  
109 inhibition of the sample (I% sample) divided from the control sample with the NAP where the  
110 bacteria were not used (I% control). The biodegradation efficiency percentage (BE%) was used  
111 to express the toxicity of the tested samples and calculated according to:

$$112 \text{ BE\%} = \text{I\% control} - \text{I\% sample}$$

#### 113 Effect of different carbon sources on PAHs biodegradation

114 Five different carbon sources, including glucose, galactose, fructose, maltose, and sucrose  
115 were added individually into MM medium at a concentration of 1.5%. The isolate grown as  
116 described above was resuspended in MM medium ( $A_{600}$ , 0.6) and the resuspension was used  
117 as an inoculum for this experiment. The inoculated flasks were incubated in a shaking  
118 incubator (as described above). Samples were withdrawn at pre-determined time intervals  
119 and NAP degradation efficiency of the culture was determined by luminescence inhibition  
120 (using the BioTox kit as described above).

#### 121 Effect of pH on NAP biodegradation

122 Batch experiments were performed to study the effect of pH on NAP biodegradation. Briefly,  
123 100 mg/L NAP was mixed with 100 mL of MM containing 3% inoculums. The pH of the culture  
124 medium was adjusted from 5 to 10. The flasks were incubated in a shaking incubator as  
125 described above (200 rpm) at  $27 \pm 2^\circ\text{C}$  for 7 days. Samples were withdrawn at predetermined  
126 time intervals and luminescence inhibition was determined.

#### 127 Effect of NaCl on NAP biodegradation

128

129 The effect of NaCl on biodegradation of NAP was performed in batch experiments. Briefly,  
130 NaCl (1–15%) was added individually to MM bottles containing NAP and the bottles were  
131 incubated in a shaking incubator as described above for 7 days. Samples were withdrawn at  
132 fixed time intervals and luminescence inhibition was determined.

133

134 EPS extraction. EPS extraction was performed as described earlier with small modifications <sup>51</sup>.  
135 Briefly, bacterial cultures were diluted 1:5 with distilled water and centrifuged for 30 min at  
136 17,600 g at 20 °C to separate cells. Then, EPS were precipitated by slowly pouring the  
137 supernatant into two volumes of isopropanol while stirring at 200 rpm. The filtered  
138 polysaccharide was suspended in a digestion solution consisting of 0.1M MgCl<sub>2</sub>, 0.1 mg/ml  
139 DNase, and 0.1 mg/ml RNase solution, and incubated for 4 h at 37°C. Samples were extracted  
140 twice with phenol-chloroform, and lyophilised using a Virtis SP Scientific 2.0 freeze dryer. For  
141 the emulsification, drop collapse and oil spreading assay the dialysed EPS were taken into  
142 initial volume in double distilled sterile water.

#### 143 Glucan production assay

144 The bacterial strains were incubated for 5 days as described above. The glucan production  
145 assay was performed as described earlier <sup>52</sup>. Briefly, after incubation, glucan was recovered by  
146 adding an equal volume of 0.6N NaOH with 30 min stirring to the production medium. The  
147 bacterial cells were removed from the production medium by centrifugation at 10,000 rpm for  
148 10 min. The supernatant was neutralized to pH 7 by adding 4N acetic acid. Then the material  
149 was washed with water until the pH was neutralized, causing the precipitation of the curdlan,  
150 which was thereafter lyophilized.

#### 151 Emulsification assay

152 The emulsification assay used was previously described by Cooper and Goldenberg <sup>53</sup>. Cell-free  
153 culture broth/bacterial EPS or glucan (200 µl), obtained as described above, was used to determine the  
154 emulsification of NAP in an Eppendorf tube containing 600 µl of distilled water. 1.2 ml of NAP was  
155 mixed with each sample in triplicate. For two min the mixture was vortexed, and the emulsion was  
156 allowed to stand for 24 h. Water and NAP served as negative controls. The height of the emulsion  
157 layer was then measured. The emulsification index was calculated based on the ratio of the height of  
158 the emulsion layer and the total height of the liquid [EI % = (emulsion/ total h) x 100]. To determine  
159 the stability of the emulsification ability of the biosurfactant, the emulsification index was also

160 determined after 3 and 7 days.

### 161 Drop-collapse test

162 Both bacterial strains' culture filtrates and A26Sfp EPS and glucan extracts were submitted to a drop-  
163 collapse test, using the procedure described by Jain et al.<sup>54</sup>. For a period of 7 days the strains were grown in  
164 MM medium and 5 µl of the cell-free culture broth (supernatant centrifuged 13,000 x g, 15 min) was  
165 dropped on a glass slide covered with crude oil. The result was considered positive for biosurfactant  
166 production when the drop diameter was at least 1 mm larger than that produced by distilled water  
167 (negative control).

### 168 Oil spreading assay

169 10 µl of crude oil was placed on the surface of a Petri dish that contained 40 ml of distilled water.  
170 A thin layer of oil was formed, as described earlier<sup>10</sup>. Culture supernatants, EPS and glucan extracts  
171 (10 µl, obtained as above) were then placed in the center of the oil layer. If the oil is displaced by an  
172 oil-free clearing zone, then biosurfactant is present in the supernatant. A negative control was  
173 performed with distilled water (without biosurfactant), and no oil displacement or clear zone was  
174 observed.

### 175 NAP degradation in soil

176 Sterile uncontaminated peat soil was artificially contaminated by adding the defined NAP  
177 mixture, prepared in DCM, to a sterile jar, allowing the solvent to evaporate, and then adding  
178 soil to the jar. After thorough mixing, the homogeneity of NAP distribution was confirmed by  
179 testing using the luminescence inhibition assay in five random samples of the soil. The soil was  
180 subdivided into 200 g (dry weight) lots of 1.5-liter jars. The jars were then inoculated to  
181 provide a bacterial population of 10<sup>6</sup> cells per g of soil. Controls, which contained NAPs but  
182 lacked inoculum, were set up similarly. All soil cultures were supplemented with sterile MM  
183 solution with 5% NaCl, 1.5% sucrose, pH 8 (see above) to approximately 65% of the soil's  
184 water-holding capacity and were incubated at 25°C in the dark.

185 Three samples of 1 g of soil from each jar were collected periodically for analysis of NAP  
186 biodegradation and measurement of the microbial population as described by us earlier<sup>55</sup>.  
187 Briefly, aliquots of 10 mM of primers 1492R (5'-GGTTACCTTGTTACGACTT-39') and 27F  
188 (5'-AGAGTTTGATCCTGGCTCAG-3') and 1 ml of template were used. The reaction was  
189 performed in 10 ml. The reaction conditions were 95°C for 2 min followed by 30 cycles of  
190 denaturation at 95°C for 15 s, annealing at 55°C for 20 s, primer extension at 72°C for 1 min,



191 followed by the final extension at 72°C for 5 min. For sequencing, the PCR products were  
192 purified with a QIAquick™ Gel Extraction kit (QIAGEN, Hilden, Germany).

### 193 Data confirmation and validation.

194 To ensure reproducibility, three biological replicates of every treatment, were performed.  
195 Replicated data were studied for normal distribution and analysed by MiniTab17 ANOVA. The  
196 treatment effects were considered statistically significant,  $p \leq 0.01$  (indicted by different letters)  
197 or nonsignificant. Univariate analysis of selected samples involving distribution and variability  
198 of distribution was performed using the Unscrambler X10.4.1 descriptive statistics.

199

## 200 **Results**

### 201 Biodegradation in the presence of NAP

202 The growth of A26 and A26Sfp in the presence and absence of NAPs at an initial  
203 concentration of 100 mg/L was determined as optical density at 600 nm (Fig 1). The time  
204 course indicates that both strains are capable of utilizing NAP. It is often reported that  
205 biodegradation is dependent on survival, characterized by ODs. However, this measure would  
206 also indicate adaptation. Hence biodegradation was analyzed using the bioluminescence  
207 inhibition test (Fig 2). Generally, microorganisms require suitable growth conditions (as  
208 regards e.g. carbon sources, nutrients, pH) since these strongly affect their growth. Higher  
209 degradation efficiency was observed in flasks containing sucrose as a carbon source (Fig 3).  
210 Minimum degradation was observed in fructose media (Fig 3).

211 Our results show that maximum degradation efficiency was reached at 5<sup>th</sup> day. A26Sfp and  
212 A26 efficiently degraded NAP by 69 and 49%, respectively, in 5 days of incubation in liquid  
213 medium and soil (Fig 2).. Somewhat reduced numbers in the degradation efficiency in the case  
214 of degradation in soil (55 and 44%) were observed (Fig 2). Our results show that the two strains  
215 used in the study perform best in the medium supplemented with sucrose (Fig 3) and 5% NaCl  
216 (Fig 4). at pH 8 (Fig 5). While the A26 biodegradation efficiency is significantly reduced at  
217 the pH 5, 6, and at 15% NaCl, the mutant remains effective even at extreme conditions  
218 of pH and salinity (Fig 4 and 5).

### 219 Emulsifying activity

220 Emulsifying activity was tested in both bacterial strain culture filtrates as well as the A26Sfp

221 EPS and A26Sfp glucan extracts. The standard assay for emulsifying activity was based on  
222 a modification of the method of Cooper and Goldenberg<sup>53</sup>. The tested compounds included  
223 kerosene and hexadecane. The results with A26 and A26Sfp culture filtrates, A26Sfp EPS  
224 and A26Sfp glucan extracts show 63%, 45%, 44%, 20%, degradation ability and with  
225 hexadecane and 59%, 45%, 45%, 21% degradation ability with kerosene, respectively. (Table  
226 2). All compounds that showed emulsification activity were also positive in the drop and oil  
227 spreading assays (Table 2).

### 228 Glucan production

229 The polysaccharide glucan production was estimated after weighing the lyophilized material  
230 produced by the A26 and A26Sfp strains. While the A26 produced glucans at 0.62 mg/L the  
231 mutant ability was two times higher at 1.2 mg per L. (Table 2).

### 232 **Discussion**

233 Our study reveals that A26Sfp and A26 efficiently degraded NAP by 69% and 49%,  
234 respectively, after 5 days of incubation in liquid medium and soil. Somewhat reduced numbers  
235 for the degradation efficiency in the case of degradation in soil reflect that additional factors  
236 such as soil physical properties and texture porosity may influence the degradation process.  
237 Generally, microorganisms require suitable growth conditions (e.g. as regards carbon sources,  
238 nutrients, pH) which strongly affect their growth. Carbon sources in the growth medium are  
239 considered to be key factors for PAH degrading bacteria. For use in bioremediation, PAH  
240 degraders should ideally mineralize and grow on PAHs as sole carbon and energy source. This  
241 would minimize the production of toxic, water-soluble degradation by-products. In our  
242 experiments the strains that used sucrose and 5 % NaCl were most efficient at pH 8. The pH is  
243 one of the most important factors for PAH degradation in the culture medium, as it affects  
244 bacterial enzymatic activity as well as nutrient solubility<sup>9,56</sup>. The mutant strain can remain  
245 effective even at extreme conditions of pH, and salinity.

246 Most often, chemical parameters are employed to evaluate and analyze PAHs in the  
247 environment. The chemical methods are accurate and sensitive for specific molecules, but do  
248 not give information regarding biological influence within the ecosystem. Chemical methods  
249 do not consider synergistic effects from compound mixtures and there is therefore a risk that  
250 they underestimate the toxic potential of a particular sample. Therefore, evaluation of  
251 biological influence using rapid simple and economic methods can provide information about  
252 all compounds and incorporate these important toxicity parameters. The bioluminescence



253 inhibition method has been shown to correlate well with the total level of PAHs and has been  
254 used for NAP ecotoxicity studies <sup>57</sup>.

255

256 Several microbes have a great potential for the production of bioactive secondary metabolites  
257 associated with PAH biodegradation and various pathways have been revealed <sup>8,9 10,11 12-16</sup>..  
258 However, owing to the hydrophobic nature of the PAHs the first step must be surface tension  
259 reduction <sup>4</sup> . Therefore, the biodegradation of PAH is dependent on biosurfactants, i.e.  
260 compounds that lower interfacial tension between PAH and the soil water face.

261

262 Different classes of surfactants have been discovered, and the surfactin group encoded by  
263 the *sfp* gene belongs to the group of non-ribosomal compounds that has been considered as one  
264 of the most powerful biosurfactant groups <sup>15</sup>. The A26 surfactin production was inactivated  
265 and non-ribosomal proteins including surfactin are not produced by the mutant strain<sup>19</sup>.  
266 Polysaccharides (glucans) with the ability to emulsify and reduce surface tension of cells were  
267 very surprisingly overproduced by the mutant strain (Table 2). The surfactin ability can be  
268 partly linked to the increased glucan production. The A26Sfp strains can emulsify kerosene  
269 and hexadecane 60% and 59%, respectively, and A26 45 % and 50%, respectively. The  
270 property is comparable to a 0.5 solution of the nonionic surfactant Tween 80 <sup>56</sup> and can be  
271 linked with, but not limited to, the A26Sfp production of relatively high amounts of EPS and  
272 glucans (Table 2). Polysaccharide surfactants are an emerging class of biodegradable nontoxic  
273 and sustainable alternatives to conventional surfactant systems <sup>3,5,58,59</sup> .

274

275

276 Here we show that besides non-ribosmally produced lipopeptides of *P. polymyxa* (represented  
277 by the *Sfp* gene products), there are other most efficient EPS surfactants produced by A26Sfp.  
278 Polysaccharide-based emulsifiers of microbial origin have attracted attention, as they  
279 offer several advantages over synthetic emulsifiers, including lower toxicity, higher  
280 degradability, and better compatibility with the environment. In addition, they can  
281 remain effective even at extreme conditions of pH and salinity. These properties  
282 increase their scope for application in a diverse range of biotechnological areas. It has  
283 been repeatedly shown that the bacteria from extreme environments offer good  
284 candidates for efficient PAH biodegradation and biosurfactant producers <sup>10</sup>. To the  
285 best of our knowledge, it has not been reported earlier that Sfp-type 4-  
286 phosphopantetheinyl transferase deletion, making the strain incapable of NRP and PKS

287 production, can cause a significant change in polysaccharide production and  
288 composition.

289

290 **Conclusion:** It may be concluded from this investigation that both the bacterial strains A26  
291 and A26Sfp showed significant ability to degrade NAP. The degradation ability of the mutant  
292 is high and may be of industrial importance. A26Sfp is easy and safe to use, as the mutant is  
293 non-sporulating, which abolishes the possibility for secondary contamination. These  
294 compounds produced by the mutant strain are involved in surface tension reduction but may  
295 not be the only ones of great importance. The rich composition of the *Paenibacillus polymyxa*  
296 A26 Sfp exopolysaccharides deserves attention.

## 297 **References**

298 1 Polli, J. R. *et al.* Quantitative analysis of PAH compounds in DWH crude oil and their  
299 effects on *Caenorhabditis elegans* germ cell apoptosis, associated with CYP450s  
300 upregulation. *Sci Total Environ* **745**, 140639, doi:10.1016/j.scitotenv.2020.140639 (2020).

301 2 Fang, C. *et al.* Biomonitoring of aromatic hydrocarbons in clam *Meretrix meretrix*  
302 from an emerging urbanization area, and implications for human health. *Ecotoxicology and*  
303 *environmental safety* **192**, 110271, doi:10.1016/j.ecoenv.2020.110271 (2020).

304 3 Saliu, F. *et al.* Evaluation of chitosan aggregates as pickering emulsifier for the  
305 remediation of marine sediments. *Chemosphere* **273**, 129733,  
306 doi:10.1016/j.chemosphere.2021.129733 (2021).

307 4 Huang, X. D., El-Alawi, Y., Penrose, D. M., Glick, B. R. & Greenberg, B. M. A  
308 multi-process phytoremediation system for removal of polycyclic aromatic hydrocarbons  
309 from contaminated soils. *Environ Pollut* **130**, 465-476, doi:10.1016/j.envpol.2003.09.031  
310 (2004).

311 5 Chen, W. *et al.* Removal of PAHs at high concentrations in a soil washing solution  
312 containing TX-100 via simultaneous sorption and biodegradation processes by immobilized  
313 degrading bacteria in PVA-SA hydrogel beads. *J Hazard Mater* **410**, 124533,  
314 doi:10.1016/j.jhazmat.2020.124533 (2021).

315 6 Pichler, N., Maria de Souza, F., Ferreira Dos Santos, V. & Martins, C. C. Polycyclic  
316 aromatic hydrocarbons (PAHs) in sediments of the amazon coast: Evidence for localized  
317 sources in contrast to massive regional biomass burning. *Environ Pollut* **268**, 115958,  
318 doi:10.1016/j.envpol.2020.115958 (2021).

- 319 7 Campanale, C., Dierkes, G., Massarelli, C., Bagnuolo, G. & Uricchio, V. F. A  
320 Relevant Screening of Organic Contaminants Present on Freshwater and Pre-Production  
321 Microplastics. *Toxics* **8**, doi:10.3390/toxics8040100 (2020).
- 322 8 Ma, X. *et al.* Soil microbial community succession and interactions during combined  
323 plant/white-rot fungus remediation of polycyclic aromatic hydrocarbons. *Sci Total Environ*  
324 **752**, 142224, doi:10.1016/j.scitotenv.2020.142224 (2021).
- 325 9 Fernandez-Lopez, C. *et al.* Root-mediated bacterial accessibility and cometabolism of  
326 pyrene in soil. *Sci Total Environ* **760**, 143408, doi:10.1016/j.scitotenv.2020.143408 (2021).
- 327 10 de Almeida Couto, C. R., Alvarez, V. M., Marques, J. M., de Azevedo Jurelevicius,  
328 D. & Seldin, L. Exploiting the aerobic endospore-forming bacterial diversity in saline and  
329 hypersaline environments for biosurfactant production. *BMC microbiology* **15**, 240,  
330 doi:10.1186/s12866-015-0575-5 (2015).
- 331 11 Alvarez, V. M. *et al.* *Bacillus amyloliquefaciens* TSBSO 3.8, a biosurfactant-  
332 producing strain with biotechnological potential for microbial enhanced oil recovery.  
333 *Colloids and surfaces. B, Biointerfaces* **136**, 14-21, doi:10.1016/j.colsurfb.2015.08.046  
334 (2015).
- 335 12 de-Bashan, L. E. & Bashan, Y. Immobilized microalgae for removing pollutants:  
336 review of practical aspects. *Bioresource technology* **101**, 1611-1627,  
337 doi:10.1016/j.biortech.2009.09.043 (2010).
- 338 13 Girvan, M. S., Campbell, C. D., Killham, K., Prosser, J. I. & Glover, L. A. Bacterial  
339 diversity promotes community stability and functional resilience after perturbation. *Environ*  
340 *Microbiol* **7**, 301-313, doi:10.1111/j.1462-2920.2005.00695.x (2005).
- 341 14 Mahmood, S., Paton, G. I. & Prosser, J. I. Cultivation-independent in situ molecular  
342 analysis of bacteria involved in degradation of pentachlorophenol in soil. *Environ Microbiol*  
343 **7**, 1349-1360, doi:10.1111/j.1462-2920.2005.00822.x (2005).
- 344 15 Singh, A., Van Hamme, J. D. & Ward, O. P. Surfactants in microbiology and  
345 biotechnology: Part 2. Application aspects. *Biotechnol Adv* **25**, 99-121,  
346 doi:10.1016/j.biotechadv.2006.10.004 (2007).
- 347 16 Jami, M. *et al.* *Celeribacter persicus* sp. nov., a polycyclic-aromatic-hydrocarbon-  
348 degrading bacterium isolated from mangrove soil. *Int J Syst Evol Microbiol* **66**, 1875-1880,  
349 doi:10.1099/ijsem.0.000961 (2016).
- 350 17 Timmusk, S. *et al.* Bacterial distribution in the rhizosphere of wild barley under  
351 contrasting microclimates. *PLoS One* **6**, 1-8, doi:10.1371/journal.pone.0017968 (2011).

- 352 18 Timmusk, S. *et al.* Drought-tolerance of wheat improved by rhizosphere bacteria from  
353 harsh environments: enhanced biomass production and reduced emissions of stress volatiles.  
354 *PLoS One* **9**, e96086, doi:10.1371/journal.pone.0096086 (2014).
- 355 19 Timmusk, S. *et al.* Sfp-type PPTase inactivation promotes bacterial biofilm formation  
356 and ability to enhance wheat drought tolerance. *Frontiers in microbiology* **6**, 387,  
357 doi:10.3389/fmicb.2015.00387 (2015).
- 358 20 Timmusk, S., Nevo, E., Ayele, F., Noe, S. & Niinemets, Y. Fighting Fusarium  
359 Pathogens in the Era of Climate Change: A Conceptual Approach. *Pathogens* **9**,  
360 doi:10.3390/pathogens9060419 (2020).
- 361 21 Timmusk, S. *et al.* *Paenibacillus polymyxa* biofilm polysaccharides antagonise  
362 *Fusarium graminearum* DOI:10.1038/s41598-018-37718-w *Nature Sci. Rep.* (2019).
- 363 22 Timmusk, S., Seisenbaeva, G. A. & Behers, L. Titania (TiO<sub>2</sub>) nanoparticles enhance  
364 the performance of growth-promoting rhizobacteria DOI : 10.1038/s41598-017-18939-x.  
365 *Nature Sci Rep* (2018).
- 366 23 Timmusk, S. *et al.* (2020).
- 367 24 Timmusk, S., Timmusk, K. & Behers, L. Rhizobacterial plant drought stress tolerance  
368 enhancement. *J. Food Security* **V1**, p 10-16 (2013).
- 369 25 Timmusk, S. *et al.* Drought-tolerance of wheat improved by rhizosphere bacteria from  
370 harsh environments: enhanced biomass production and reduced emissions of stress volatiles.  
371 *PloS ONE* DOI **10.1371/journal.pone.0096086** (2014).
- 372 26 Kim, S.-B. & Timmusk, S. A simplified method for *Paenibacillus polymyxa* gene  
373 knockout and insertional screening. *PLoS ONE* **10.1371/journal.pone.0068092**,  
374 doi:10.1371/journal.pone.0068092 (2013).
- 375 27 Timmusk, S. & Behers, L. Enhancing drought tolerance in crops.  
376 **[tp://dx.doi.org/10.4172/2168-9768.1000e111](https://dx.doi.org/10.4172/2168-9768.1000e111)** (2012).
- 377 28 Timmusk, S. & Behers, L. Rhizobacterial application for sustainable water  
378 management on the areas of limited water resources. *Irrigation and Drainage Systems*  
379 *Engineering* **12**, doi: 10.4172/2168-9768.1000e4111 (2012).
- 380 29 Timmusk, S. *et al.* Bacterial distribution in the rhizosphere of wild barley under  
381 contrasting microclimates. *PLoS One* **6**, e17968, doi:10.1371/journal.pone.0017968 (2011).
- 382 30 Timmusk, S. & Nevo, E. in *Bacteria in agrobiolgy (vol 3) : Plant nutrient*  
383 *management* (ed D. K. Maheshwari) 285-300 (Springer Verlag, 2011).
- 384 31 Timmusk, S. Biofilm forming *Paenibacillus polymyxa* strains function as effective  
385 flocculation agents. *J Biotechnol* **150**, 264 (2010).

- 386 32 Timmusk, S., van West, P., Gow, N. A. & Huffstutler, R. P. *Paenibacillus polymyxa*  
387 antagonizes oomycete plant pathogens *Phytophthora palmivora* and *Pythium*  
388 *aphanidermatum*. *J Appl Microbiol* **106**, 1473-1481, doi:10.1111/j.1365-2672.2009.04123.x  
389 (2009).
- 390 33 Timmusk, S., Paalme, V., Lagercrantz, U. & Nevo, E. Detection and quantification of  
391 *Paenibacillus polymyxa* in the rhizosphere of wild barley (*Hordeum spontaneum*) with real-  
392 time PCR. *J Appl Microbiol* **107**, 736-745, doi:10.1111/j.1365-2672.2009.04265.x (2009).
- 393 34 Timmusk, S. Biofilm forming *Paenibacillus polymyxa* antagonises oomycete plant  
394 pathogens. *J Biotechnol* **136**, 265-266 (2008).
- 395 35 Timmusk, S., Van West, P., Gow, N. & Wagner, E. in *Mechanism of action of the*  
396 *plant growth promoting bacterium Paenibacillus polymyxa* (ed S Timmusk) (2003).
- 397 36 Timmusk, S. & Wagner, E. G. The plant-growth-promoting rhizobacterium  
398 *Paenibacillus polymyxa* induces changes in *Arabidopsis thaliana* gene expression: a possible  
399 connection between biotic and abiotic stress responses. *Mol Plant Microbe Interact* **12**, 951-  
400 959, doi:10.1094/MPMI.1999.12.11.951 (1999).
- 401 37 Choi, S. K. *et al.* Identification of a polymyxin synthetase gene cluster of  
402 *Paenibacillus polymyxa* and heterologous expression of the gene in *Bacillus subtilis*. *J*  
403 *Bacteriol* **191**, 3350-3358 (2009).
- 404 38 Choi, S. K. *et al.* Identification and functional analysis of the fusaricidin biosynthetic  
405 gene of *Paenibacillus polymyxa* E681. *Biochem Biophys Res Commun* **365**, 89-95,  
406 doi:10.1016/j.bbrc.2007.10.147 (2008).
- 407 39 Timmusk, S., Grantcharova, N. & Wagner, E. G. *Paenibacillus polymyxa* invades  
408 plant roots and forms biofilms. *Appl Environ Microbiol* **71**, 7292-7300,  
409 doi:10.1128/AEM.71.11.7292-7300.2005 (2005).
- 410 40 Mootz, H. D., Finking, R. & Marahiel, M. A. 4'-phosphopantetheine transfer in  
411 primary and secondary metabolism of *Bacillus subtilis*. *J Biol Chem* **276**, 37289-37298,  
412 doi:10.1074/jbc.M103556200 (2001).
- 413 41 Sunbul, M., Zhang, K. & Yin, J. Chapter 10 using phosphopantetheinyl transferases  
414 for enzyme posttranslational activation, site specific protein labeling and identification of  
415 natural product biosynthetic gene clusters from bacterial genomes. *Methods Enzymol* **458**,  
416 255-275, doi:10.1016/S0076-6879(09)04810-1 (2009).
- 417 42 Yuan, W. *et al.* Class I and III polyhydroxyalkanoate synthases from *Ralstonia*  
418 *eutropha* and *Allochromatium vinosum*: characterization and substrate specificity studies.  
419 *Arch Biochem Biophys* **394**, 87-98, doi:10.1006/abbi.2001.2522 (2001).

- 420 43 Powell, A. *et al.* Engineered biosynthesis of nonribosomal lipopeptides with modified  
421 fatty acid side chains. *J Am Chem Soc* **129**, 15182-15191 (2007).
- 422 44 Yin, J. *et al.* Genome-wide high-throughput mining of natural-product biosynthetic  
423 gene clusters by phage display. *Chem Biol* **14**, 303-312 (2007).
- 424 45 Flugel, R. S., Hwangbo, Y., Lambalot, R. H., Cronan, J. E., Jr. & Walsh, C. T. Holo-  
425 (acyl carrier protein) synthase and phosphopantetheinyl transfer in *Escherichia coli*. *J Biol*  
426 *Chem* **275**, 959-968 (2000).
- 427 46 Chen, X. H., Koumoutsis, A., Scholz, R. & Borriss, R. More than anticipated -  
428 production of antibiotics and other secondary metabolites by *Bacillus amyloliquefaciens*  
429 FZB42. *J Mol Microbiol Biotechnol* **16**, 14-24, doi:10.1159/000142891 (2009).
- 430 47 Lambalot, R. H. *et al.* A new enzyme superfamily - the phosphopantetheinyl  
431 transferases. *Chem Biol* **3**, 923-936 (1996).
- 432 48 Copp, J. N. & Neilan, B. A. The phosphopantetheinyl transferase superfamily:  
433 phylogenetic analysis and functional implications in cyanobacteria. *Appl Environ Microbiol*  
434 **72**, 2298-2305, doi:10.1128/AEM.72.4.2298-2305.2006 (2006).
- 435 49 Abbas, M. *et al.* *Vibrio fischeri* bioluminescence inhibition assay for ecotoxicity  
436 assessment: A review. *Sci Total Environ* **626**, 1295-1309,  
437 doi:10.1016/j.scitotenv.2018.01.066 (2018).
- 438 50 Nascimento, F. X., Glick, B. R. & Rossi, M. J. Isolation and characterization of novel  
439 soil- and plant-associated bacteria with multiple phytohormone-degrading activities using a  
440 targeted methodology. *Access Microbiol* **1**, e000053, doi:10.1099/acmi.0.000053 (2019).
- 441 51 Ruterling, M., Schmid, J., Ruhmann, B., Schilling, M. & Sieber, V. Controlled  
442 production of polysaccharides-exploiting nutrient supply for levan and heteropolysaccharide  
443 formation in *Paenibacillus* sp. *Carbohydr Polym* **148**, 326-334,  
444 doi:10.1016/j.carbpol.2016.04.074 (2016).
- 445 52 McIntosh, M., Stone, B. A. & Stanisich, V. A. Curdlan and other bacterial (1 $\rightarrow$ 3)-  
446 beta-D-glucans. *Appl Microbiol Biotechnol* **68**, 163-173, doi:10.1007/s00253-005-1959-5  
447 (2005).
- 448 53 Cooper, D. G. & Goldenberg, B. G. Surface-active agents from two bacillus species.  
449 *Appl Environ Microbiol* **53**, 224-229, doi:10.1128/aem.53.2.224-229.1987 (1987).
- 450 54 Jain, D., Collins-Thompson, D. & Lee, H. A drop-collapsing test for screening  
451 surfactant producing microorganisms. *J. Microbiol Meth* **13**, 271-279 (1991).
- 452 55 Abd El-Daim, I., Haggblom, P., Karlsson, M., Stenstrom, E. & Timmusk, S.  
453 *Paenibacillus polymyxa* A26 Sfp-type PPTase inactivation limits bacterial antagonism



454 against *Fusarium graminearum* but not of *F. culmorum* *Front. Plant Sci.* , 1-8,  
455 doi:10.3389/fpls.2015.00368

456 .

457 56 Liang, Y., Ji, M., Zhai, H. & Zhao, J. Organic matter composition, BaP  
458 biodegradation and microbial communities at sites near and far from the bioanode in a soil  
459 microbial fuel cell. *Sci Total Environ* **772**, 144919, doi:10.1016/j.scitotenv.2020.144919  
460 (2021).

461 57 Kang, H. J., Jung, Y. & Kwon, J. H. Changes in ecotoxicity of naphthalene and  
462 alkylated naphthalenes during photodegradation in water. *Chemosphere* **222**, 656-664,  
463 doi:10.1016/j.chemosphere.2019.01.153 (2019).

464 58 Milliasseau, D., Jestic, J., Pessel, F., Plusquellec, D. & Benvegna, T. Transformation  
465 of Pectins into Non-Ionic or Anionic Surfactants Using a One-Pot and Cascade Mode  
466 Process. *Molecules* **26**, doi:10.3390/molecules26071956 (2021).

467 59 Talvenmaki, H. *et al.* In situ bioremediation of Fenton's reaction-treated oil spill site,  
468 with a soil inoculum, slow release additives, and methyl-beta-cyclodextrin. *Environmental*  
469 *science and pollution research international* **28**, 20273-20289, doi:10.1007/s11356-020-  
470 11910-w (2021).

471 60 Nevo, E. *et al.* Evolution of wild cereals during 28 years of global warming in Israel.  
472 *Proc Natl Acad Sci U S A* **109**, 3412-3415, doi:10.1073/pnas.1121411109 (2012).

473

474

## 475 **Figure Legends**

476 **Figure 1.** Growth (optical density at 600 nm) of *Paenibacillus polymyxa* A26 and *P.*  
477 *polymyxa* A26Sfp in naphthalene (100 mg/L) containing medium. Different letters indicate  
478 statistically significant differences See Material and Methods

479 **Figure 2.** Degradation potential of *Paenibacillus polymyxa* A26 and *P. polymyxa* A26Sfp  
480 exposed to 100 mg/L of naphthalene in mineral medium (a) and in soil (b). Different letters  
481 indicate statistically significant differences See Material and Methods

482 **Figure 3.** Effect of carbon sources on biodegradation of naphthalene by *Paenibacillus*  
483 *polymyxa* A26 and *P. polymyxa* A26Sfp. Different letters indicate statistically significant  
484 differences See Material and Methods

485 **Figure 4** Effect of pH on biodegradation of naphthalene by *Paenibacillus polymyxa* A26 and  
 486 *P. polymyxa* A26Sfp. Different letters indicate statistically significant differences See  
 487 Material and Methods

488 **Figure 5.** Effect of salinity on biodegradation of naphthalene by *Paenibacillus polymyxa* A26  
 489 and *P. polymyxa* A26Sfp. Different letters indicate statistically significant differences See  
 490 Material and Methods

491 **Figure S1 The Evolution Canyon (EC) model**

492 Schematic diagram of the Evolution Canyon at Lower Nahal Oren, Mount Carmel (source <sup>60</sup>  
 493 Nevo, 2012 Evolution Canyon,” a potential microscale monitor of global warming across life,  
 494 PNAS 109; 8) (Photo by S. Timmusk).

495 **Table 1. Strains used in the study**

496

| name                                 | origin                                                       | publications                                                                     |
|--------------------------------------|--------------------------------------------------------------|----------------------------------------------------------------------------------|
| <i>Paenibacillus polymyxa</i> A26    | Wild barley rhizosphere, the Evolution Canyon, Haifa, Israel | Timmusk <i>et al.</i> , 2011                                                     |
| <i>Paenibacillus polymyxa</i> A26Sfp | Wild barley rhizosphere, the Evolution Canyon, Haifa, Israel | Kim and Timmusk 2013<br>Timmusk <i>et al.</i> 2013<br>Timmusk <i>et al.</i> 2015 |

497

498

499 **Table 2 Emulsion indices (%) of the strains using kerosene and hexadecane, glucan titer**  
 500 **and other characteristics**

| Strains | Emulsion index %<br>hexadecane (day) |        |        | Emulsion index %<br>kerosene (day) |        |        | DC | OS | Glucan<br>titre<br>(mg/L) | EPS<br>titre<br>(mg/L) |
|---------|--------------------------------------|--------|--------|------------------------------------|--------|--------|----|----|---------------------------|------------------------|
|         | 1                                    | 3      | 7      | 1                                  | 3      | 7      |    |    |                           |                        |
| A26Sfp  | 60±4.2                               | 63±5.2 | 60±5.2 | 63±5.2                             | 59±5.2 | 60±4.1 | +  | +  | 1.2±0.1                   | 15±0.2                 |
| A26     | 42±5.2                               | 44±5.2 | 45±3.2 | 43±5.2                             | 45±2.2 | 43±3.2 | +  | +  | 0.62±0.1                  | 10±0.2                 |

|                  |        |        |        |        |        |        |   |   |    |    |
|------------------|--------|--------|--------|--------|--------|--------|---|---|----|----|
| EPS<br>A26Sfp    | 41±2.2 | 45±2.2 | 44±2.2 | 43±2.2 | 44±3.2 | 45±2.2 | + | + | ND | ND |
| Glucan<br>A26Sfp | 20±2.0 | 20±2.2 | 21±2.2 | 21±2.2 | 21±2.1 | 23±2.2 | + | + | ND | ND |

501

502

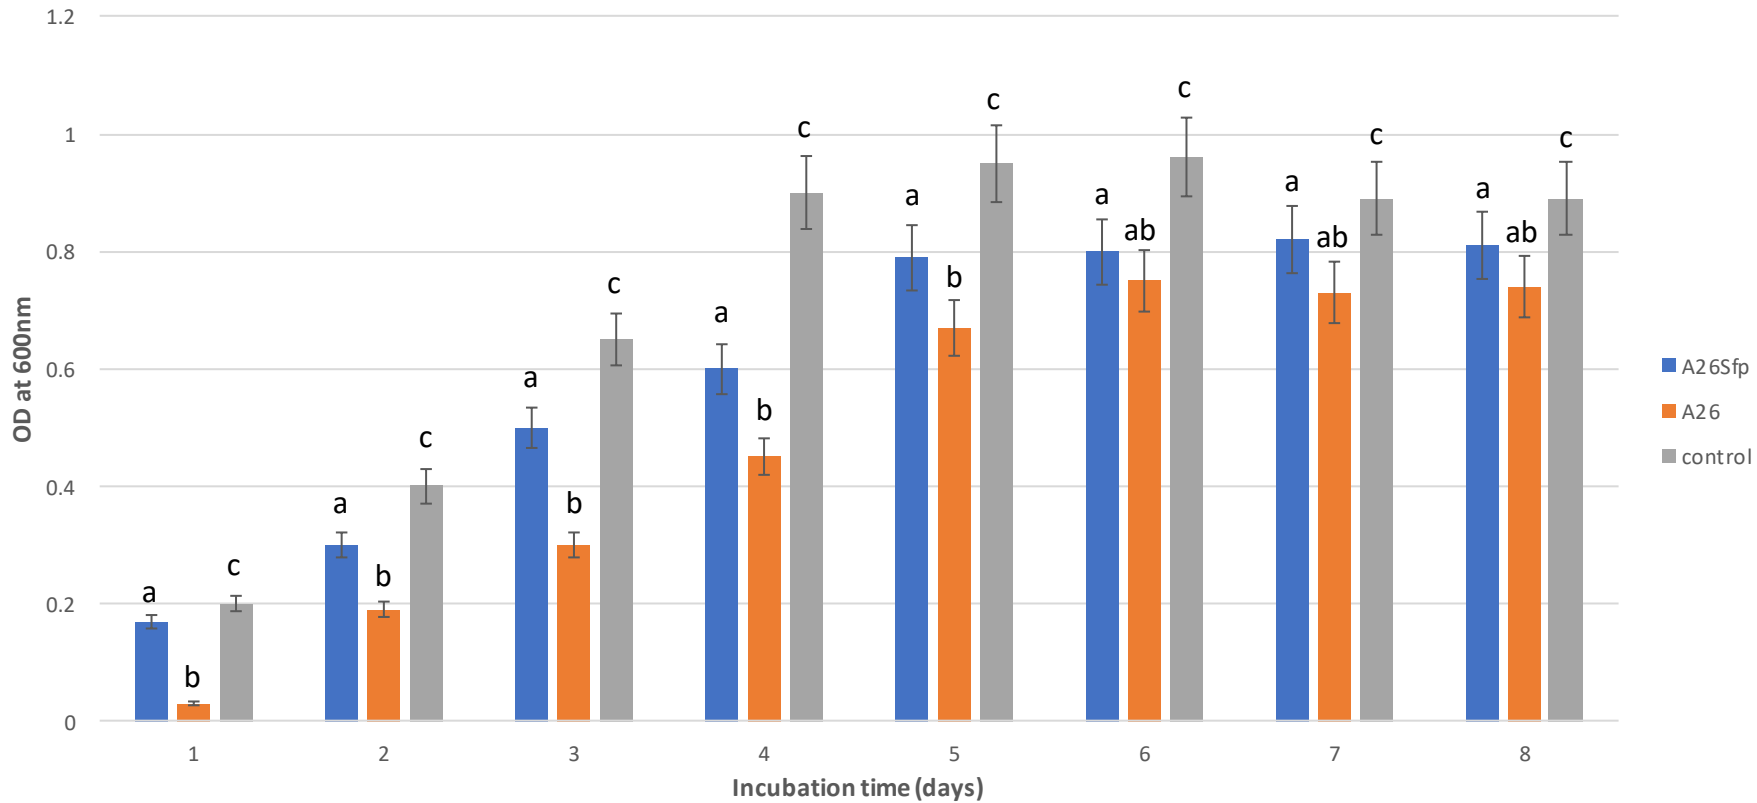

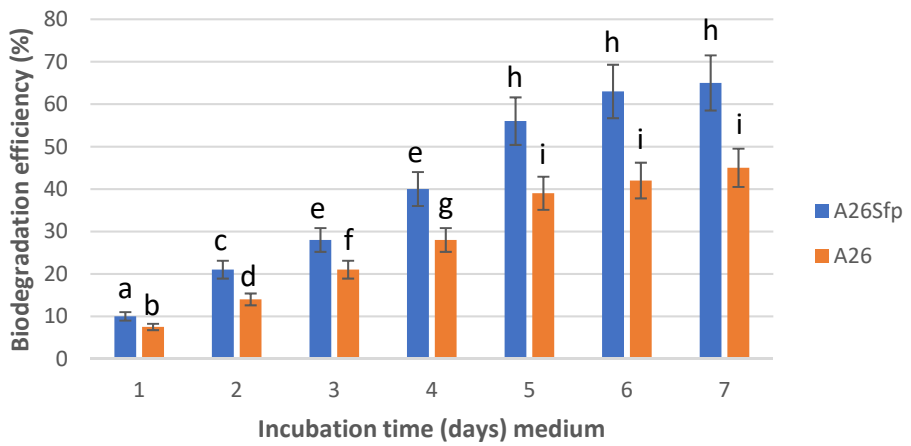

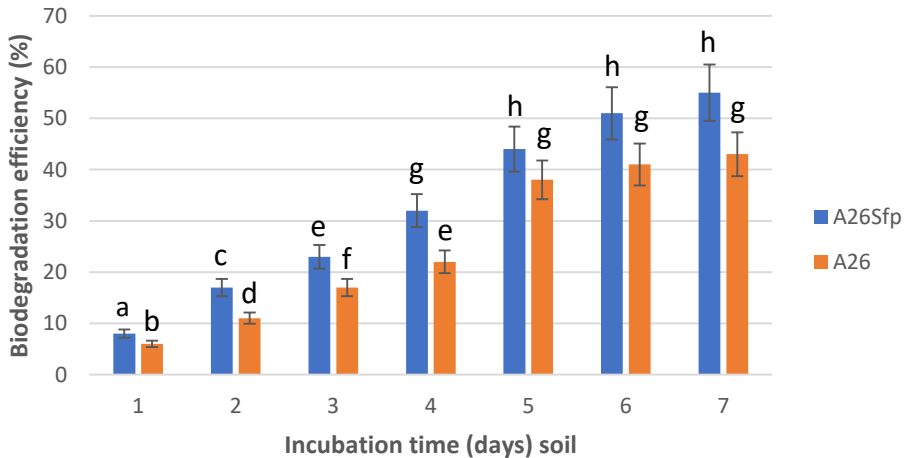



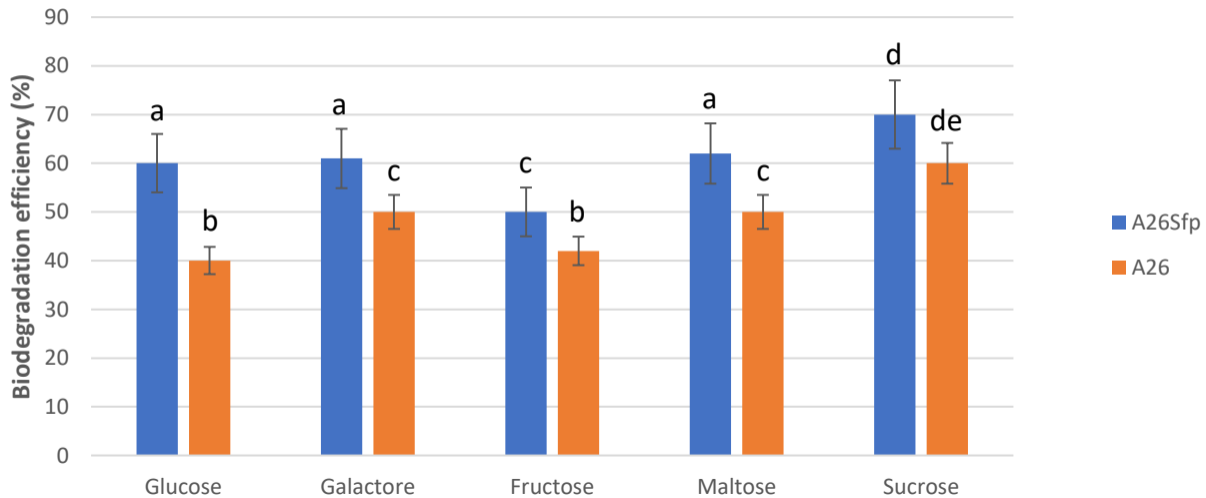

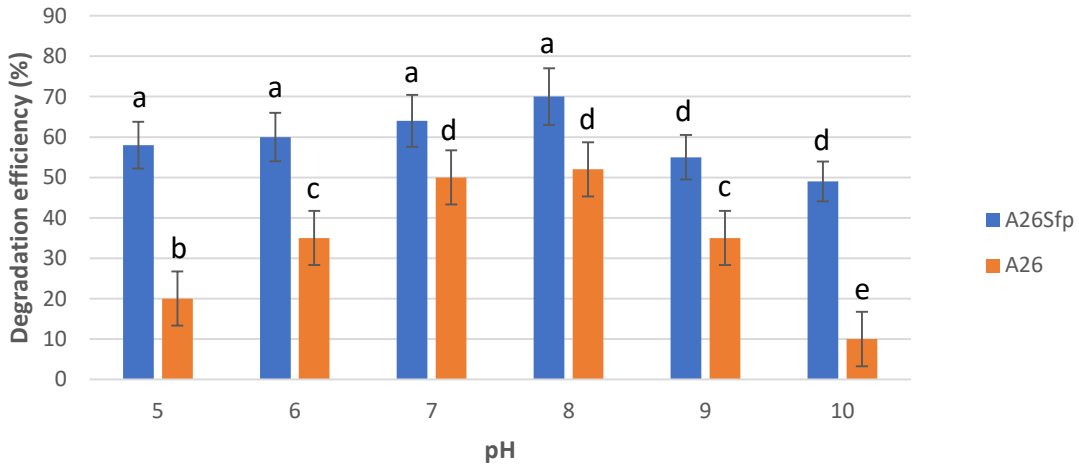

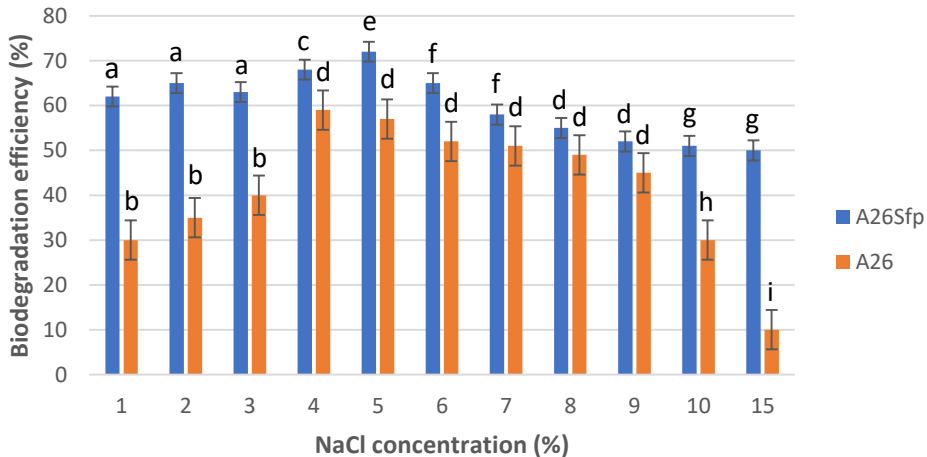

### Sampling Locations

1 & 2

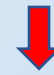

5 & 7

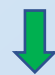

NFS

SFS

7

1

2

5

**'European'**  
North-Facing Slope  
(NFS)

**'African'**  
South-Facing Slope  
(SFS)

7

5

1

2

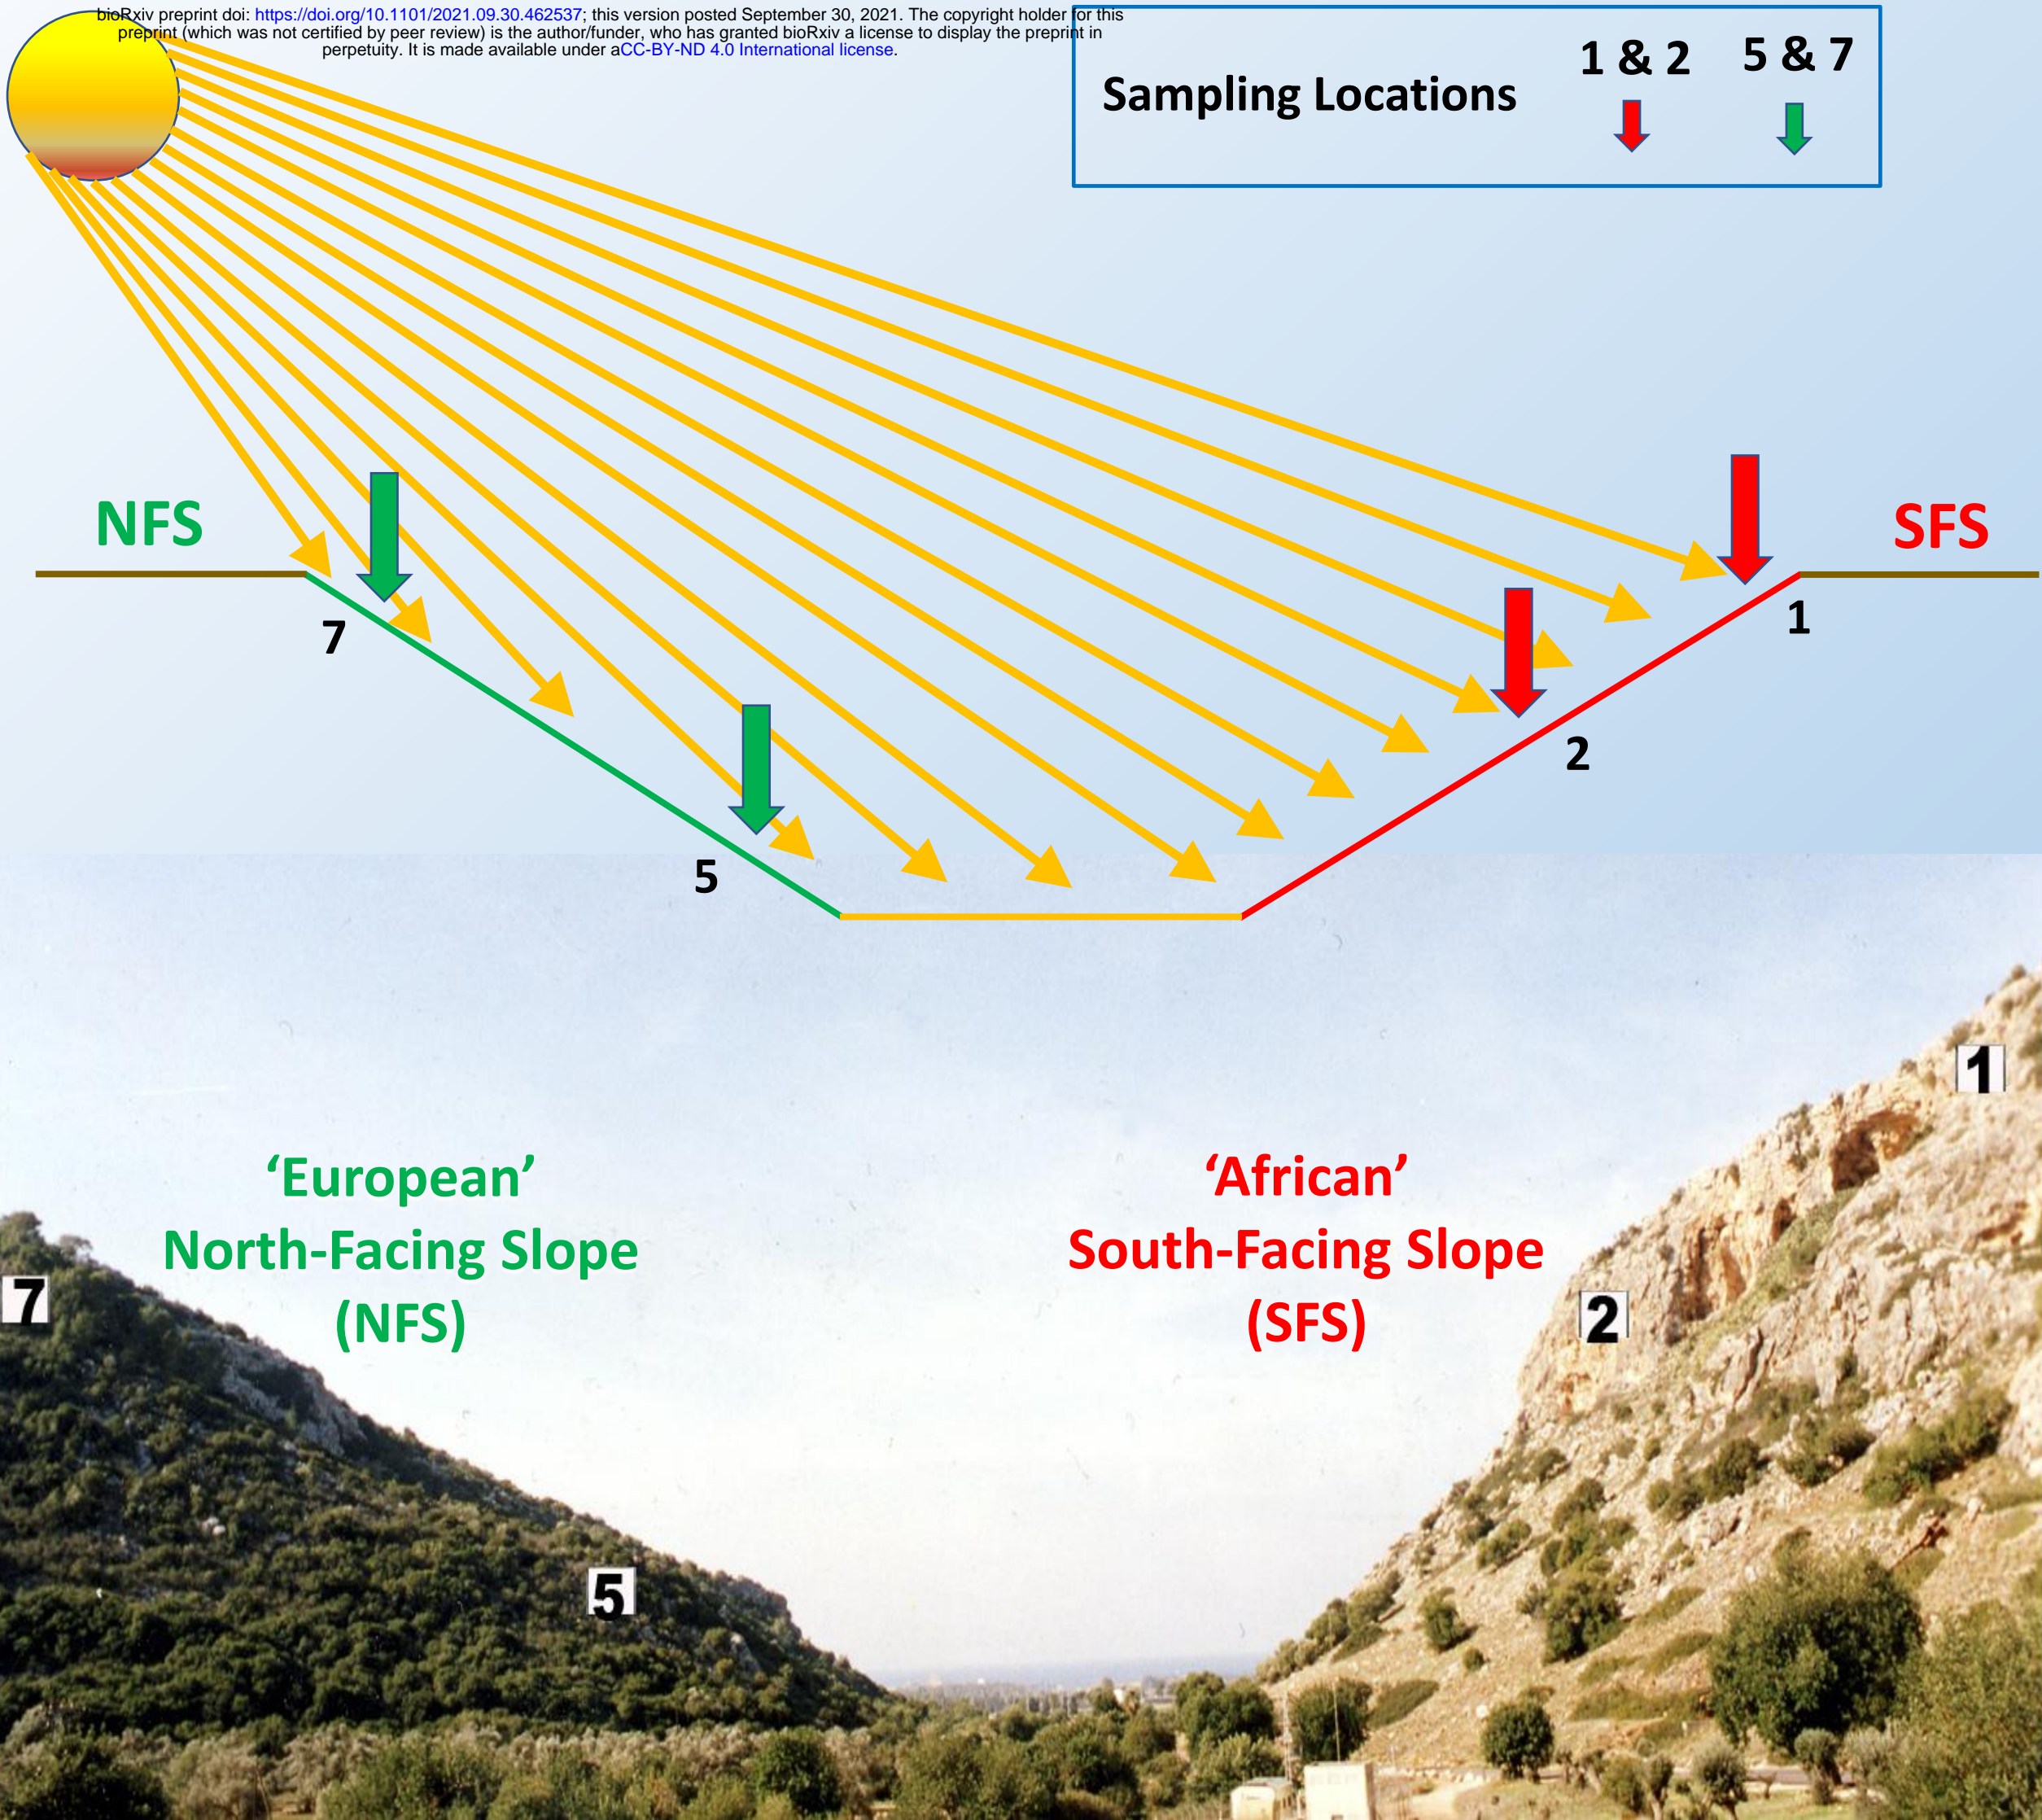

Source: https://www.biorxiv.org/content/10.1101/2021.09.30.462537v1.full.pdf
